# Supplementary material for: Enhanced C–H bond activation by tuning the local environment of surface lattice oxygen of MoO3
Source: Royal Society of Chemistry journal article supplement (doi:10.1039/d2sc01658c), 2022-01-01
Supplement: d2sc01658c1.pdf [file d2sc01658c1.pdf]

Supporting Information

**Enhanced C-H Bond Activation by Tuning the Local  
Environment of Surface Lattice Oxygen of MoO<sub>3</sub>**

Chenggong Jiang<sup>1</sup>, Xin Chang<sup>1</sup>, Xianhui Wang<sup>1</sup>, Zhi-Jian Zhao<sup>1,2\*</sup>, and Jinlong  
Gong<sup>1,2,3,4\*</sup>

*<sup>1</sup>Key Laboratory for Green Chemical Technology of Ministry of Education, School of  
Chemical Engineering and Technology, Tianjin University*

*<sup>2</sup>Collaborative Innovation Center of Chemical Science and Engineering, Tianjin  
300072, China*

*<sup>3</sup>Joint School of National University of Singapore and Tianjin University, International  
Campus of Tianjin University, Binhai New City, Fuzhou 350207, China*

*<sup>4</sup>Haihe Laboratory of Sustainable Chemical Transformations, Tianjin 300192, China*

\*Email: zjzhao@tju.edu.cn, [jlgong@tju.edu.cn](mailto:jlgong@tju.edu.cn)

## Contents

|                                                                      |    |
|----------------------------------------------------------------------|----|
| S1 Computational details.....                                        | 3  |
| DFT calculation model, method, and $U_{\text{eff}}$ value test ..... | 5  |
| Crossing potential model details.....                                | 10 |
| Differential charge density analysis.....                            | 11 |
| Optimized POM structure and surface H adsorption energy .....        | 12 |
| Thermogravimetric analysis.....                                      | 13 |
| Ab initio molecular dynamics simulations .....                       | 14 |
| Transition state structure details.....                              | 17 |
| S2 Experimental details .....                                        | 19 |
| Catalyst preparation.....                                            | 19 |
| Characterization .....                                               | 19 |
| Redox performance tests .....                                        | 19 |

## S1 Computational details

### Energy, entropy and kinetic information details

The adsorption energy is calculated as follows:

$$\Delta E_{\text{ads}} = E_{\text{adsorbate+ surface}} - E_{\text{surface}} - E_{\text{gas}}$$

The activation energy is calculated as follows:

$$E_a = E_{\text{TS}} - E_{\text{IS}}$$

Where  $E_a$  is the activation energy,  $E_{\text{TS}}$  is the transition state energy and  $E_{\text{IS}}$  is the initial state energy.

The Gibbs free energy ( $G$ ) is calculated as follows:

$$G = H - TS = E_{\text{DFT}} + \text{ZPE} + \int_0^T C_V dT - TS$$

Where  $H$  is enthalpy,  $S$  is entropy,  $T$  is temperature,  $E_{\text{DFT}}$  is the electron energy calculated by DFT, ZPE is zero-point energy and  $C_V$  is isovolumetric heat capacity.  $C_V$  and Gas-phase entropies ( $S_0^{\text{gas}}(T)$ ) are taken from the NIST Chemistry Webbook<sup>40</sup>. The adsorption mode of propane was not taken into consideration in free energy analysis.

It is worth noting that some studies have shown that in some cases (at high temperature in particular), the entropy of the adsorbed species may be quite different from that calculated from the vibrational frequency under the harmonic approximation. Campbell et al. reported that under low coverage, the entropy of molecular adsorbate on the plane can be expressed as semiempirical Campbell-Sellers equation<sup>41 42</sup> (The entropies of all adsorbed state species are calculated using the following equation):

$$S_0^{\text{ad}}(T) = 0.70S_0^{\text{gas}}(T) - 3.3R$$

The rate constant ( $k$ ) of the rate determining step (RDS) is calculated by Eyring–Polanyi equation<sup>43</sup> as follows:

$$k = \frac{\kappa k_{\text{B}} T}{h} e^{-\frac{\Delta G^\ddagger}{RT}}$$

where  $\Delta G^\ddagger$  is the Gibbs free energy of activation,  $\kappa$  is the transmission coefficient (often assumed to be equal to one),  $k_{\text{B}}$  is Boltzmann's constant, and  $h$  is Planck's constant.

## DFT calculation model, method, and $U_{\text{eff}}$ value test

To determine the appropriate van der Waals correction, some common van der Waals correction functionals (Grimme D2<sup>27</sup>, Grimme D3<sup>28</sup>, vdW-DF2<sup>29</sup>, BEEF-vdW<sup>30</sup>) were tested by using the hybrid functional HSE06<sup>31, 32</sup> and the lattice constants measured experimentally<sup>33</sup> as the benchmark. The bilayers of  $\alpha$ -MoO<sub>3</sub> (010) crystal face are connected by van der Waals force in z-axis direction, so the difference between different van der Waals correction functionals is mainly reflected in z-axis (i.e., b direction). As a result, the Grimme D2 correction was identified as the most appropriate van der Waals correction. (Figure S1 and Table S1)

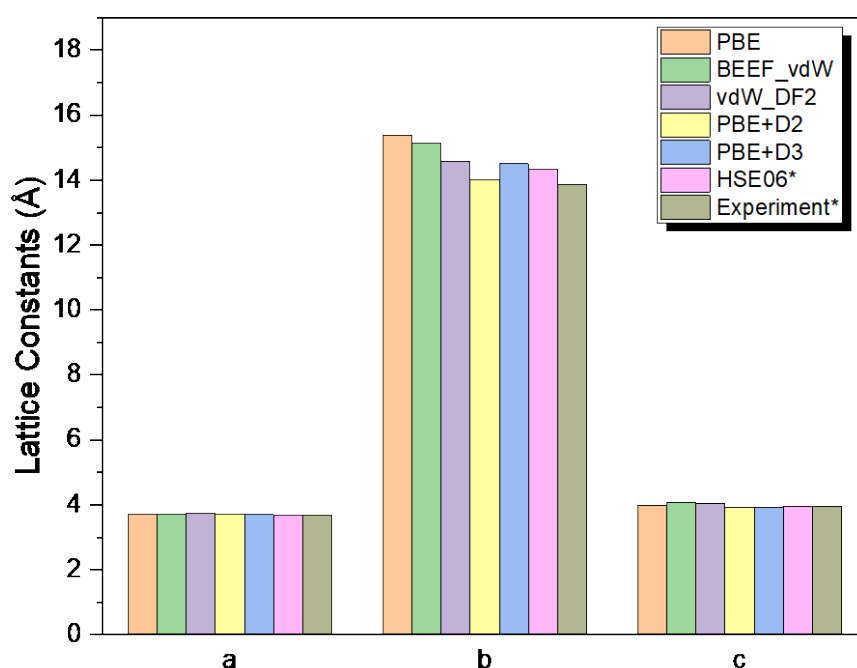

Fig. S1 Optimized lattice constants from different functionals calculation and experimental value.

**Table S1** Optimized lattice constants from different functionals calculation and experimental value.

| Method      | Lattice Constants (Å) |       |      |
|-------------|-----------------------|-------|------|
|             | a                     | b     | c    |
| PBE         | 3.72                  | 15.38 | 3.97 |
| BEEF_vdW    | 3.71                  | 15.13 | 4.06 |
| vdW_DF2     | 3.75                  | 14.58 | 4.05 |
| PBE+D2      | 3.71                  | 14.01 | 3.93 |
| PBE+D3      | 3.71                  | 14.50 | 3.92 |
| HSE06*      | 3.69                  | 14.33 | 3.95 |
| Experiment* | 3.69                  | 13.86 | 3.96 |

\*: the benchmark value of calculation or experiment

Table S2 The detailed structure information of  $\alpha$ -MoO<sub>3</sub> (010)

| Bond     | Bond length/ Å | E <sub>vac</sub> / eV | E <sub>H</sub> / eV |
|----------|----------------|-----------------------|---------------------|
| Mo=Ot    | 1.69           | 1.92                  | -0.19               |
| Mo-Oa-Mo | 1.78 (left)    | 2.04                  | -0.48               |
|          | 2.17 (right)   |                       |                     |
| Mo-Os-Mo | 1.96           | 2.86                  | -0.06               |

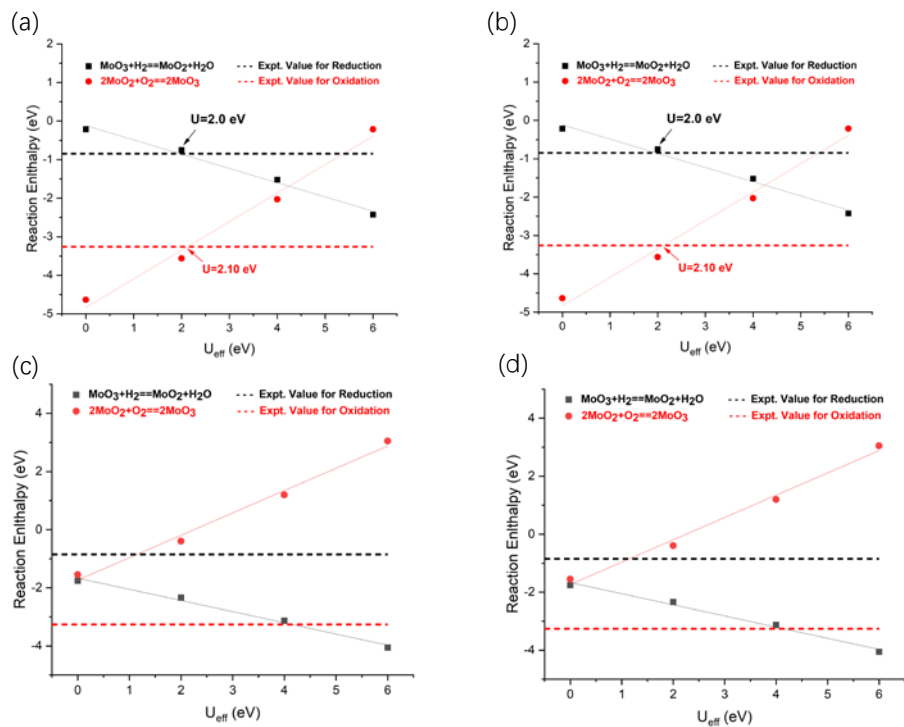

**Fig. S2** Fitting the enthalpy of formation and reduction of  $\text{MoO}_3$  with different  $U_{\text{eff}}$  values. (a)PBE; (b) PBE+D2; (c) vdW-DF2; (d) BEEF-vdW



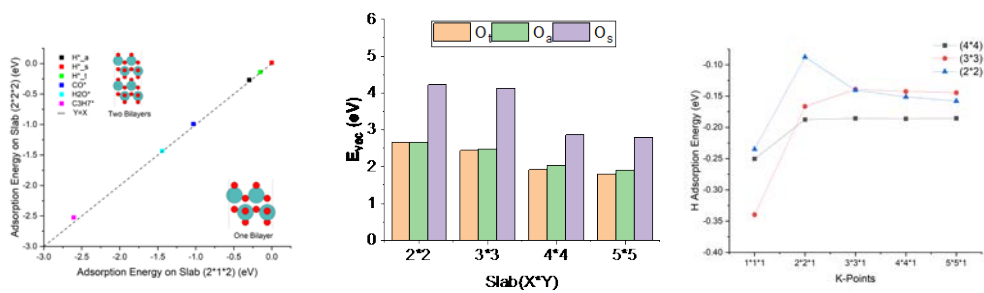

**Fig. S3.** Determining the appropriate model size: (a) Z-axis; (b) XY-plane and (c) k-point convergence test.

## Crossing potential model details

The crossing potential model is an approximate calculation based on the accurate transition state structure. Between the optimized stable initial state structure ( $\text{C}_3\text{H}_8^*$ ) and the transition state structure ( $\text{C}_3\text{H}_7\cdots\text{H}$ ), a series of linear interpolation points are obtained by NEB method to simulate the dynamic process of propane C-H bond activation and adsorbate induced surface reconstruction from the initial state to the transition state. The single point energy calculation of these structures is carried out to draw the physisorption potential function plot.

Similarly, the same single point energy calculation was performed between the transition state structure ( $\text{C}_3\text{H}_7\cdots\text{H}$ ) and the optimized radical structure ( $\text{C}_3\text{H}_7(\text{g}) + \text{H}^*$ ) to plot the chemisorption potential function curve.

## Differential charge density analysis

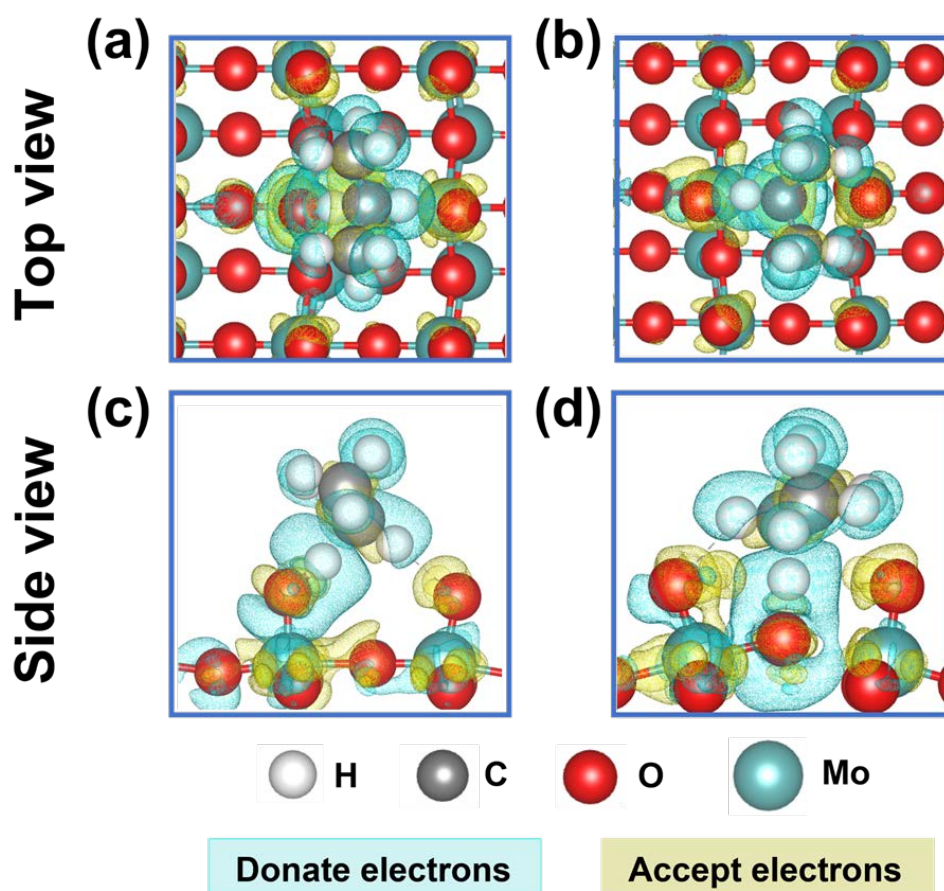

**Fig S4.** Differential charge density plot for C-H bond activation of propane methylene on  $\alpha$ - $\text{MoO}_3$ . Mo-O<sub>a</sub>-Mo: (a) top view; (c) side view. Mo=O<sub>t</sub>: (b) top view; (d) side view.

In order to show more clearly the electron transfer processes occurring on the metal-oxygen species during the C-H bond activation, we have added a differential charge analysis (**Fig. S5**) of the propane C-H bond activation transition state on two lattice oxygens (Mo=O<sub>t</sub> and Mo-O<sub>a</sub>-Mo) on  $\text{MoO}_3$ . We can see that during C-H bond activation, H first transfers electrons to the lattice oxygen, which transfers electrons to the metal cation.

## Optimized POM structure and surface H adsorption energy

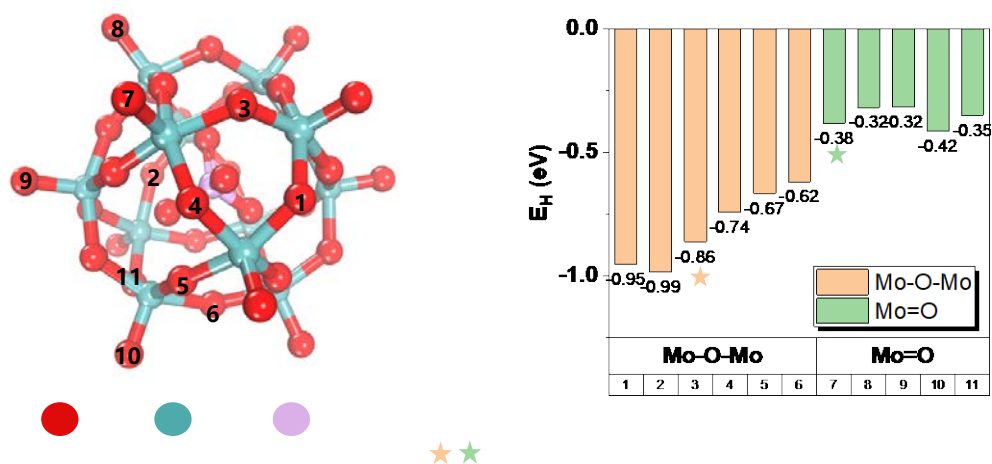

**Fig. S5** (a) Optimized structure of POM; (b) the adsorption energy of H on different active sites.

## Thermogravimetric analysis

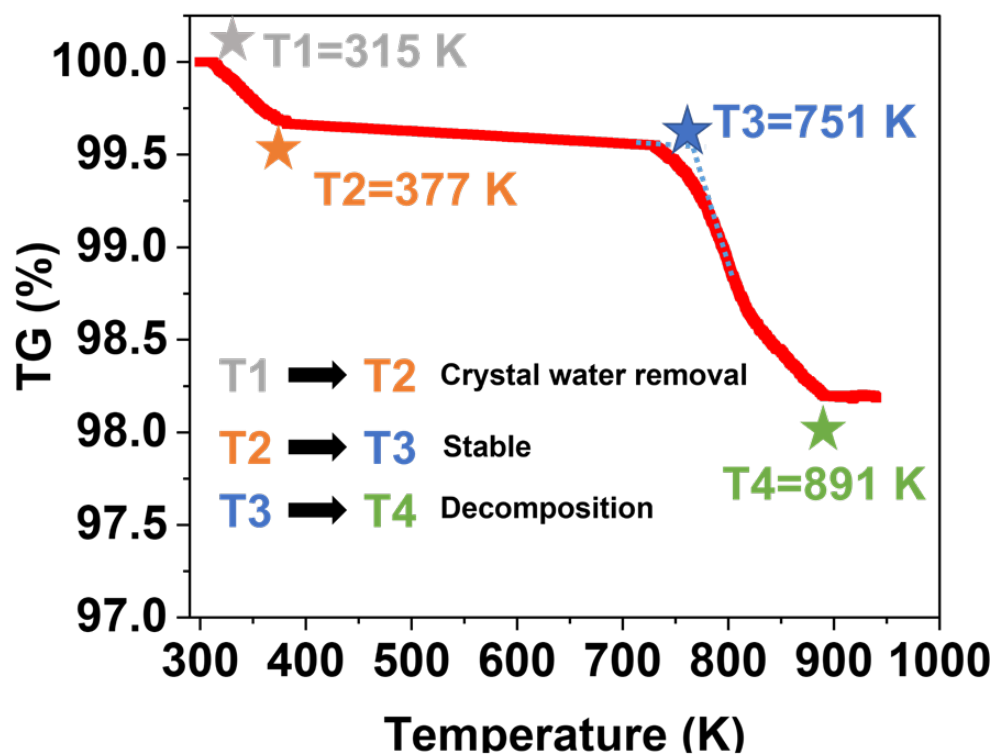

**Fig. S6** Thermogravimetric analysis for 20 wt%  $\text{H}_3\text{PMo}_{12}\text{O}_{40}/\text{Al}_2\text{O}_3$ . (from 300 K to 950 K)

## Ab initio molecular dynamics simulations

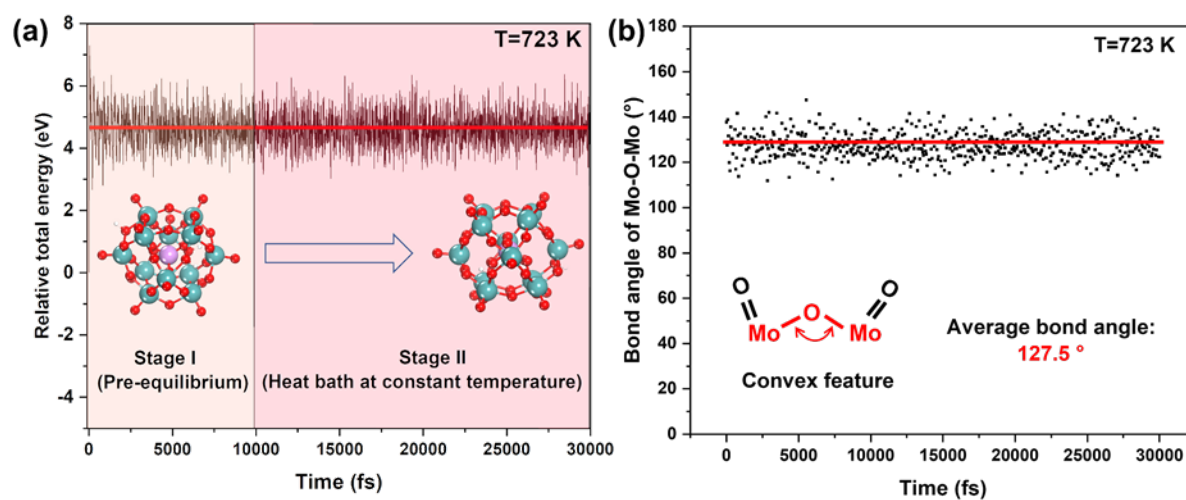

**Fig. S7** Ab initio molecular dynamics simulations (AIMD) of  $\text{H}_3\text{PMo}_{12}\text{O}_{40}$  at 723 K and NVT ensemble. (a) Total energy dynamic changes; (b) Dynamic monitoring of Mo-O-Mo bond angles.

**Table S3. Comparable structure of  $\alpha$ -MoO<sub>3</sub> and POM (H<sub>3</sub>PMo<sub>12</sub>O<sub>40</sub>)**

| Information                 | $\alpha$ -MoO <sub>3</sub> | POM                  |
|-----------------------------|----------------------------|----------------------|
| Coordination number (Mo)    | 6                          | 6                    |
|                             | Octahedron                 | Octahedron           |
| Bader charge (Mo)           | +2.61 ( $\pm 0.06$ )       | +2.59 ( $\pm 0.11$ ) |
| Surface lattice oxygen      | Mo=O; Mo-O-Mo              | Mo=O; Mo-O-Mo        |
| Surface topography          | Crystal particle           | Cluster              |
| Local environment (Mo-O-Mo) | Concave                    | Convex               |

**Table S4.** Calculation details for Gibbs's free energy ( $\Delta G$ ) (T=723 K)

| Species                                    | Catalyst<br>Active Site                                     | E-DFT<br>(eV) | ZPE<br>(eV) | $\Delta H$<br>(eV) | T $\times\Delta S$<br>(eV) | $\Delta G$<br>(eV) |
|--------------------------------------------|-------------------------------------------------------------|---------------|-------------|--------------------|----------------------------|--------------------|
| C <sub>3</sub> H <sub>8</sub> (g)          | —                                                           | 0.00          | 2.74        | 3.37               | 2.85                       | 0.51               |
| C <sub>3</sub> H <sub>7</sub> ...H<br>(TS) | $\alpha$ -MoO <sub>3</sub><br>Mo=O                          | 1.16          | 2.55        | 4.30               | 1.71                       | 2.59               |
| C <sub>3</sub> H <sub>7</sub> ...H<br>(TS) | H <sub>3</sub> PMo <sub>12</sub> O <sub>40</sub><br>Mo-O-Mo | 1.06          | 2.54        | 4.22               | 1.71                       | 2.51               |



## Transition state structure details

Table S5 All transition state structure details

| Reactant                      | Catalyst                            | Active site               | d(C-H)/Å | Structure | C-H Activation Energy/ eV |
|-------------------------------|-------------------------------------|---------------------------|----------|-----------|---------------------------|
| CH <sub>4</sub>               | $\alpha$ -MoO <sub>3</sub><br>(010) | Mo=O <sub>t</sub>         | 1.49     |           | 1.87                      |
| CH <sub>4</sub>               | $\alpha$ -MoO <sub>3</sub><br>(010) | Mo-O <sub>a</sub> -<br>Mo | 1.38     |           | 1.98                      |
| CH <sub>4</sub>               | $\alpha$ -MoO <sub>3</sub><br>(010) | Mo-O <sub>s</sub> -<br>Mo | 1.49     |           | 2.28                      |
| C <sub>2</sub> H <sub>6</sub> | $\alpha$ -MoO <sub>3</sub><br>(010) | Mo=O <sub>t</sub>         | 1.41     |           | 1.41                      |
| C <sub>2</sub> H <sub>6</sub> | $\alpha$ -MoO <sub>3</sub><br>(010) | Mo-O <sub>a</sub> -<br>Mo | 1.33     |           | 1.58                      |
| C <sub>2</sub> H <sub>6</sub> | $\alpha$ -MoO <sub>3</sub><br>(010) | Mo-O <sub>s</sub> -<br>Mo | 1.44     |           | 1.91                      |
| C <sub>3</sub> H <sub>8</sub> | $\alpha$ -MoO <sub>3</sub><br>(010) | Mo=O <sub>t</sub>         | 1.39     |           | 1.15                      |
| C <sub>3</sub> H <sub>8</sub> | $\alpha$ -MoO <sub>3</sub><br>(010) | Mo-O <sub>a</sub> -<br>Mo | 1.33     |           | 1.39                      |
| C <sub>3</sub> H <sub>8</sub> | $\alpha$ -MoO <sub>3</sub><br>(010) | Mo-O <sub>s</sub> -<br>Mo | 1.37     |           | 1.74                      |
| CH <sub>4</sub>               | POM                                 | Mo=O                      | 1.51     |           | 1.91                      |

|                               |                                     |                           |      |                                                                                      |      |
|-------------------------------|-------------------------------------|---------------------------|------|--------------------------------------------------------------------------------------|------|
| CH <sub>4</sub>               | POM                                 | Mo-O-Mo                   | 1.40 | 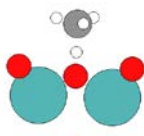   | 1.59 |
| C <sub>2</sub> H <sub>6</sub> | POM                                 | Mo=O                      | 1.43 |    | 1.58 |
| C <sub>2</sub> H <sub>6</sub> | POM                                 | Mo-O-Mo                   | 1.34 |    | 1.27 |
| C <sub>3</sub> H <sub>8</sub> | POM                                 | Mo=O                      | 1.39 |    | 1.28 |
| C <sub>3</sub> H <sub>8</sub> | POM                                 | Mo-O-Mo                   | 1.31 |   | 1.06 |
| C <sub>3</sub> H <sub>8</sub> | $\alpha$ -MoO <sub>3</sub><br>(010) | Mo=O <sub>t</sub>         | 1.51 |  | 1.22 |
| C <sub>3</sub> H <sub>8</sub> | $\alpha$ -MoO <sub>3</sub><br>(010) | Mo-O <sub>a</sub> -<br>Mo | 1.46 |  | 1.14 |

## S2 Experimental details

### Catalyst preparation

MoO<sub>3</sub> (99.5%, Meryer Technologies Co., Ltd.) was employed as the reference catalyst without further treatment. The Al<sub>2</sub>O<sub>3</sub> supported H<sub>3</sub>PMo<sub>12</sub>O<sub>40</sub> catalysts with different H<sub>3</sub>PMo<sub>12</sub>O<sub>40</sub> loading (20 %) were prepared by a simple wet impregnation method. Typically, desired amount of H<sub>3</sub>PMo<sub>12</sub>O<sub>40</sub> (AR, Tianjin Guangfu Technology Development Co., Ltd.) was dissolved into 5 ml deionized water. Then the solution was drop wise to 1 g of  $\gamma$ -Al<sub>2</sub>O<sub>3</sub> powder (Adamas, 99.99%, SBET = 180 m<sup>2</sup>/g). The mixture was shook and kept with continuous ultrasonic concussion for 1 h. The supported POM catalysts were obtained after drying in air overnight.

### Characterization

X-ray powder diffraction (XRD) patterns were recorded using Rigaku C/max-2500 diffractometer with graphite filtered Cu K $\alpha$  radiation ( $\lambda$  = 1.5406 Å) in the 2 $\theta$  range from 10 to 50°. Transmission electron microscopy (TEM) was operated on a JEM-F200 transmission electron microscope at a working voltage of 100 kV. Liquid nitrogen cooled energy-dispersive X-ray spectroscopy (EDS) detector was employed for elemental analysis

Thermal gravity analyses were operated on Setaram Themys thermogravimetry apparatus. Typically, 20 mg of the 20 wt% POM/Al<sub>2</sub>O<sub>3</sub> redox catalysts were pre-heated in the suspend crucible at 473 K for 30 minutes under N<sub>2</sub> flow to evaporate the crystallized water. After cooled to room temperature, the sample was then heated to 950 K with a rate of 10 K/min under N<sub>2</sub> flow and the TG profile was recorded with temperature increasing. To eliminate the buoyancy and drag effects, the weight loss experiment was conducted with a blank experiment using the blank crucible at same reaction conditions.

### Redox performance tests

The dehydrogenation activity reaction was operated in a quartz fixed-bed reactor 8 mm in ID and 24 cm in length. 0.5 g catalysts (20-40 mesh) diluted with 1 g of quartz particles were loaded in the quartz reactor under atmospheric pressure. The catalysts were heated to the required temperature (723 K) under nitrogen flow (17 mL/min). Afterward, propane flow (4 mL/min) was introduced. The Gas Hour Space Velocity (GHSV) was around 2500 h<sup>-1</sup>. The outlet gas was analyzed by on-line gas chromatography (GC 2060) equipped with a flame ionization detector (Chromosorb 102 column) and a thermal conductivity detector (Al<sub>2</sub>O<sub>3</sub> Plot column). The

instantaneous propane conversion and propylene selectivity at 5<sup>th</sup> minute was calculated based on equation (1) and equation (2)

$$\text{Con (\%)} = 100 \times ([\text{FC}_3\text{H}_8]_{\text{inlet}} - [\text{FC}_3\text{H}_8]_{\text{outlet}}) / [\text{FC}_3\text{H}_8]_{\text{inlet}}. \quad (1)$$

$$\text{Sel (\%)} = 100 \times [\text{FC}_3\text{H}_6]_{\text{outlet}} / ([\text{FC}_3\text{H}_8]_{\text{inlet}} - [\text{FC}_3\text{H}_8]_{\text{outlet}}) \quad (2)$$

$\text{FC}_3\text{H}_8$  and  $\text{FC}_3\text{H}_6$  are ascribed to the mole flow rate of propane and propylene, respectively.
